# Supplementary material for: Dental extraction, intensity-modulated radiotherapy of head and neck cancer, and osteoradionecrosis: A systematic review and meta-analysis
Source: PubMed Central journal article supplement (PMC8863691; doi:10.1007/s00066-021-01896-w), 2022-01-14
Supplement: 66_2021_1896_MOESM1_ESM.pdf [file 66_2021_1896_MOESM1_ESM.pdf]

**Appendix 1: Search terms**

---

|                                  |                               |                                                                                                                                                                                                                             |
|----------------------------------|-------------------------------|-----------------------------------------------------------------------------------------------------------------------------------------------------------------------------------------------------------------------------|
| <u>Medline/PubMed (Search 1)</u> | Population:                   | #1 (((("head and neck neoplasms/radiotherapy"[MeSH Terms])) OR "cranial irradiation"[MeSH Terms]) OR "radiation therapy"                                                                                                    |
|                                  | Intervention:                 | #2 (((((((("tooth extraction") OR "teeth extraction") OR "dental extraction") OR "extraction of teeth") OR "exodontia") OR "exodontics") OR "molar extraction") OR "odontoectomy") OR "tooth removal") OR "tooth resection" |
|                                  | Comparison:                   | Not applied                                                                                                                                                                                                                 |
|                                  | Outcome:                      | Not applied                                                                                                                                                                                                                 |
|                                  | Language:                     | #3 ("german"[Language]) OR "english"[Language]                                                                                                                                                                              |
|                                  | Search query:                 | #1 AND #2 AND #3                                                                                                                                                                                                            |
|                                  | Search date:                  | 28.09.19, no restriction applied                                                                                                                                                                                            |
|                                  | Number of articles found (n): | 191                                                                                                                                                                                                                         |

---

|                                  |                               |                                                  |
|----------------------------------|-------------------------------|--------------------------------------------------|
| <u>Medline/PubMed (Search 2)</u> | Population:                   | #1 radiotherapy, intensity modulated[MeSH Terms] |
|                                  | Intervention:                 | #2 Not applied                                   |
|                                  | Comparison:                   | #3 Not applied                                   |
|                                  | Outcome:                      | #4 "osteoradionecrosis"[MeSH Terms]              |
|                                  | Search query:                 | #2 AND #4                                        |
|                                  | Search date:                  | 21.01.20, no restriction applied                 |
|                                  | Number of articles found (n): | 45                                               |

---

|                          |                               |                                                                                                                                                                                                                                                                                                                                                                                                                                                                                                                                                                                                                                                                                                                                                                                                                                                                                                                                                                                                                                                                                                                                                                                                                                                |
|--------------------------|-------------------------------|------------------------------------------------------------------------------------------------------------------------------------------------------------------------------------------------------------------------------------------------------------------------------------------------------------------------------------------------------------------------------------------------------------------------------------------------------------------------------------------------------------------------------------------------------------------------------------------------------------------------------------------------------------------------------------------------------------------------------------------------------------------------------------------------------------------------------------------------------------------------------------------------------------------------------------------------------------------------------------------------------------------------------------------------------------------------------------------------------------------------------------------------------------------------------------------------------------------------------------------------|
| <u>Embase (Search 1)</u> | Population:                   | #1 ('skull irradiation/exp OR 'cranial irradiation' OR 'irradiation, cranial' OR 'skull irradiation' OR 'skull radiation' OR 'radiotherapy/exp OR 'bioradiant therapy' OR 'bucky irradiation' OR 'bucky radiation' OR 'bucky radiotherapy' OR 'bucky ray' OR 'bucky ray radiation' OR 'bucky therapy' OR 'fractionated radiotherapy' OR 'hemibody irradiation' OR 'hypophysectomy, radiation' OR 'hypophysis irradiation' OR 'hypophysis radiation' OR 'irradiation therapy' OR 'irradiation treatment' OR 'irradiation, hypophysis' OR 'lymphatic irradiation' OR 'pituitary irradiation' OR 'radiation beam centration' OR 'radiation repair' OR 'radiation therapy' OR 'radiation treatment' OR 'radio therapy' OR 'radio treatment' OR 'radiohypophysectomy' OR 'radiology, therapeutic' OR 'radiotherapy' OR 'radiotherapy setup errors' OR 'radiotreatment' OR 'roentgen irradiation, therapeutic' OR 'roentgen therapy' OR 'roentgen treatment' OR 'rontgen therapy' OR 'therapeutic radiology' OR 'therapy, irradiation' OR 'therapy, radiation' OR 'therapy, roentgen' OR 'treatment, irradiation' OR 'treatment, radiation' OR 'treatment, roentgen' OR 'x radiotherapy' OR 'x ray therapy' OR 'x ray treatment' OR 'x-ray therapy') |
|                          | Intervention:                 | #2 ('teeth extraction/exp OR 'tooth extraction/exp OR 'dental extraction' OR 'dental extractions' OR 'exodontia' OR 'exodontics' OR 'extraction, tooth' OR 'molar amputation' OR 'molar extraction' OR 'odontectomy' OR 'tooth extraction' OR 'tooth removal' OR 'tooth resection')                                                                                                                                                                                                                                                                                                                                                                                                                                                                                                                                                                                                                                                                                                                                                                                                                                                                                                                                                            |
|                          | Comparison:                   | Not applied                                                                                                                                                                                                                                                                                                                                                                                                                                                                                                                                                                                                                                                                                                                                                                                                                                                                                                                                                                                                                                                                                                                                                                                                                                    |
|                          | Outcome:                      | Not applied                                                                                                                                                                                                                                                                                                                                                                                                                                                                                                                                                                                                                                                                                                                                                                                                                                                                                                                                                                                                                                                                                                                                                                                                                                    |
|                          | Filter:                       | #3 ([adult]/lim OR [aged]/lim OR [middle aged]/lim OR [young adult]/lim) AND ([english]/lim OR [german]/lim) AND [humans]/lim                                                                                                                                                                                                                                                                                                                                                                                                                                                                                                                                                                                                                                                                                                                                                                                                                                                                                                                                                                                                                                                                                                                  |
|                          | Search query:                 | #1 AND #2 AND #3                                                                                                                                                                                                                                                                                                                                                                                                                                                                                                                                                                                                                                                                                                                                                                                                                                                                                                                                                                                                                                                                                                                                                                                                                               |
|                          | Search date:                  | 28.09.19, no restriction applied                                                                                                                                                                                                                                                                                                                                                                                                                                                                                                                                                                                                                                                                                                                                                                                                                                                                                                                                                                                                                                                                                                                                                                                                               |
|                          | Number of articles found (n): | 273                                                                                                                                                                                                                                                                                                                                                                                                                                                                                                                                                                                                                                                                                                                                                                                                                                                                                                                                                                                                                                                                                                                                                                                                                                            |

---

|                          |                               |                                                                                                                                                                                                                                                                                                                                                                                                                               |
|--------------------------|-------------------------------|-------------------------------------------------------------------------------------------------------------------------------------------------------------------------------------------------------------------------------------------------------------------------------------------------------------------------------------------------------------------------------------------------------------------------------|
| <u>Embase (Search 2)</u> | Population:                   | #1 ('intensity modulated radiation therapy'/exp OR 'imrt' OR 'intensity modulated arc therapy' OR 'intensity modulated photon radiotherapy' OR 'intensity modulated radiation therapy' OR 'intensity modulated radiotherapy' OR 'intensity modulated therapy' OR 'intensity-modulated radiation therapy' OR 'intensity-modulated radiotherapy' OR 'radiotherapy, intensity modulated' OR 'radiotherapy, intensity-modulated') |
|                          | Intervention:                 | #2 ('tooth extraction'/exp OR 'dental extraction' OR 'dental extractions' OR 'exodontia' OR 'exodontics' OR 'extraction, tooth' OR 'molar amputation' OR 'molar extraction' OR 'odontectomy' OR 'tooth extraction' OR 'tooth removal' OR 'tooth resection')                                                                                                                                                                   |
|                          | Comparison:                   | #3 Not applied                                                                                                                                                                                                                                                                                                                                                                                                                |
|                          | Outcome:                      | #4 ('bone necrosis'/exp OR 'bone necrosis' OR 'necrosis, bone' OR 'osteonecrosis' OR 'osteoradionecrosis')                                                                                                                                                                                                                                                                                                                    |
|                          | Search query:                 | #1 AND #2 AND #4                                                                                                                                                                                                                                                                                                                                                                                                              |
|                          | Search date:                  | 21.01.20, no restriction applied                                                                                                                                                                                                                                                                                                                                                                                              |
|                          | Number of articles found (n): | 39                                                                                                                                                                                                                                                                                                                                                                                                                            |
| <u>Cochrane Library</u>  | Population:                   | #1 MeSH descriptor: [Head and Neck Neoplasms] explode all trees and with qualifier(s): [radiotherapy - RT]<br>#2 MeSH descriptor: [Radiotherapy] explode all trees and with qualifier(s): [adverse effects - AE]<br>#3 MeSH descriptor: [Cranial Irradiation] explode all trees and with qualifier(s): [adverse effects - AE]<br>#4 radiation therapy<br>#5 irradiated patients<br>#6 children                                |
|                          | Intervention:                 | #7 MeSH descriptor: [Tooth Extraction] explode all trees<br>#8 dental extraction<br>#9 exodontia<br>#10 exodonticon<br>#11 molar amputation<br>#12 molar extraction<br>#13 odontectomy<br>#14 tooth removal<br>#15 tooth resection                                                                                                                                                                                            |
|                          | Comparison:                   | Not applied                                                                                                                                                                                                                                                                                                                                                                                                                   |
|                          | Outcome:                      | Not applied                                                                                                                                                                                                                                                                                                                                                                                                                   |
|                          | Language:                     | Not applied                                                                                                                                                                                                                                                                                                                                                                                                                   |
|                          | Search query:                 | {OR #1-#5} AND {OR #7-#15} NOT #6                                                                                                                                                                                                                                                                                                                                                                                             |
|                          | Search date:                  | 28.09.19, no restriction applied                                                                                                                                                                                                                                                                                                                                                                                              |
|                          | Number of articles found (n): | 74                                                                                                                                                                                                                                                                                                                                                                                                                            |
